# Supplementary material
Source: PubMed Central journal article supplement (PMC7324015)
Supplement: NIHMS1574861-supplement-Sup_Fig1.pdf [file NIHMS1574861-supplement-Sup_Fig1.pdf]

Figure 1a  
Caspase-1

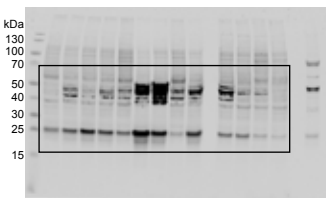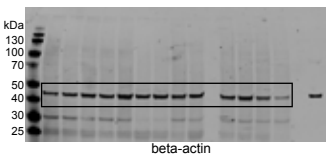

Figure 1c  
IL-1beta

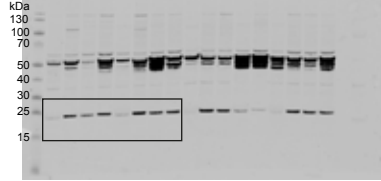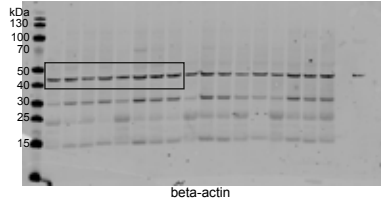

Figure 1e  
Caspase-1

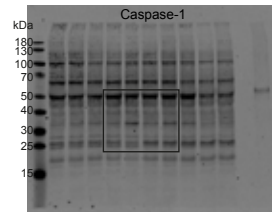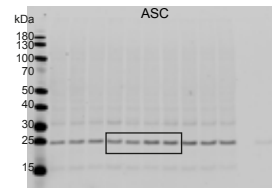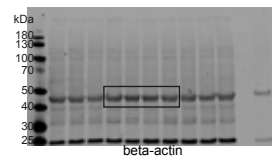

Figure 3a

dem. PP2A subunit C

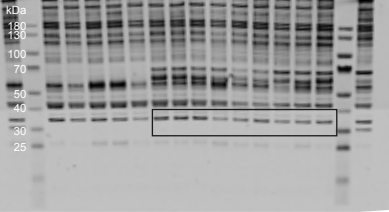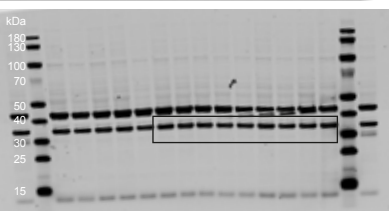

PP2A subunit C

Figure 3a

PME-1

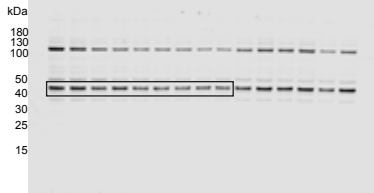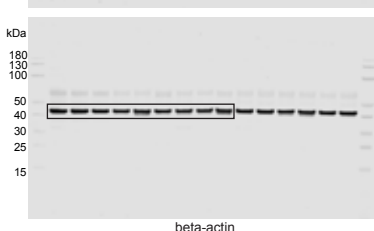

beta-actin

Figure 3a

pGSK-3beta

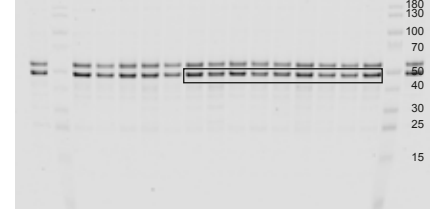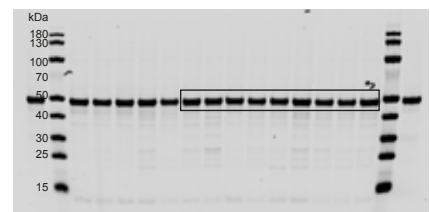

GSK-3beta

Figure 3a

p25 and p35

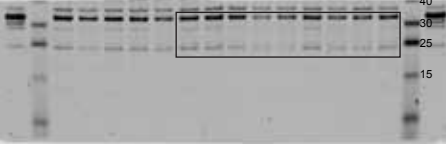

Figure 3a

p-p38

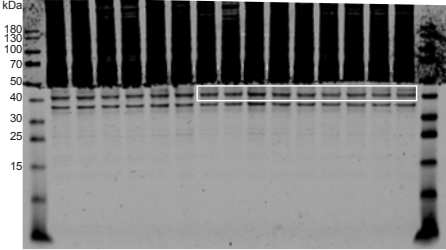

Figure 3a

pCaMKII-α

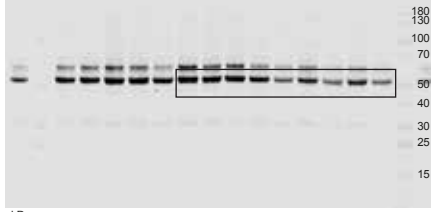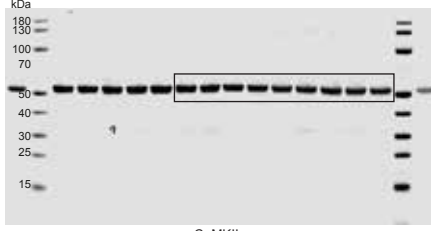

CaMKII-α

p38

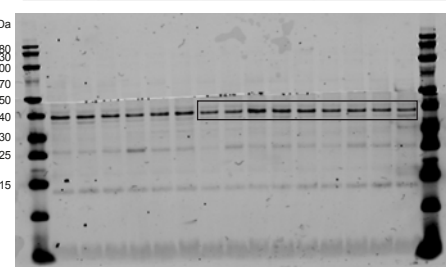

Figure 4b

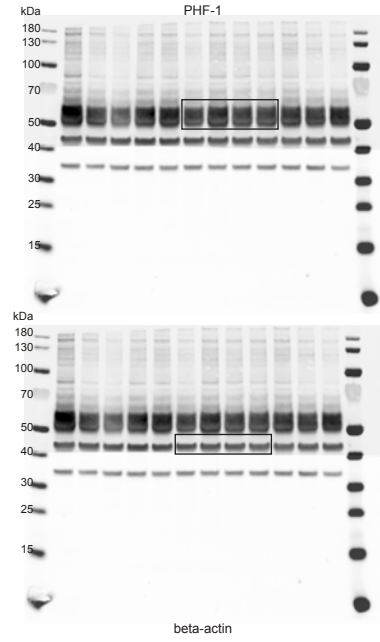

Figure 4c

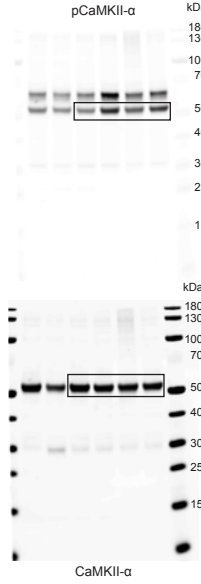

Figure 4d

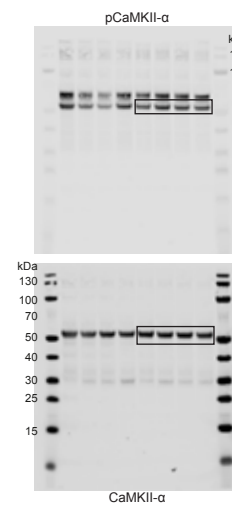

Figure 4e

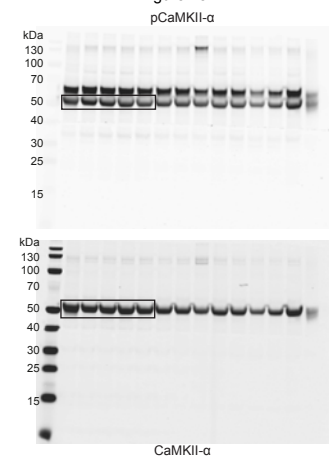

Extended Data Fig. 1e

Caspase-1

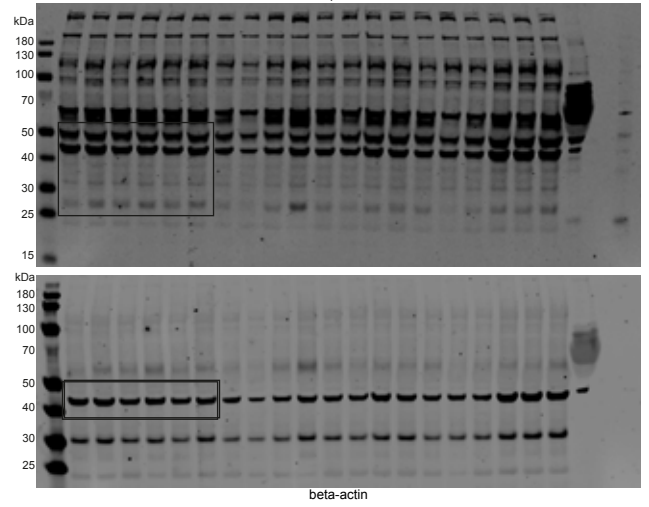

Extended Data Fig. 1a

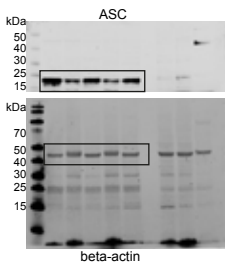

Extended Data Fig. 1g

IL-1beta

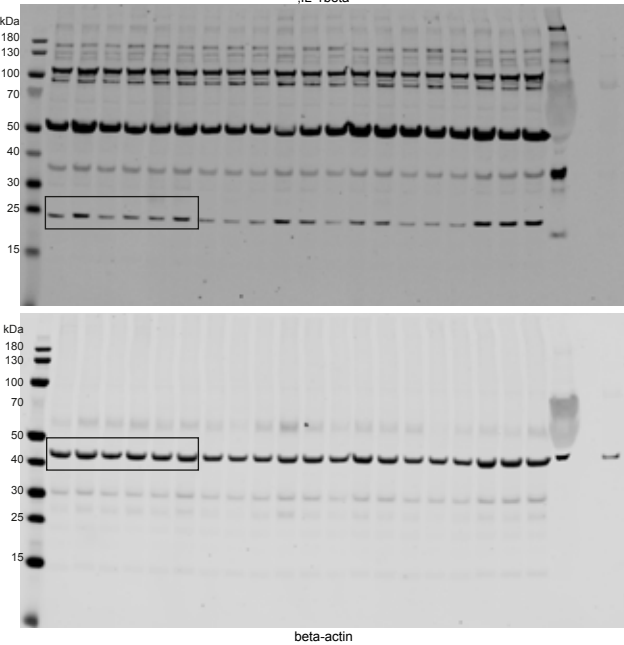

Extended Data Fig. 5a

Caspase-1

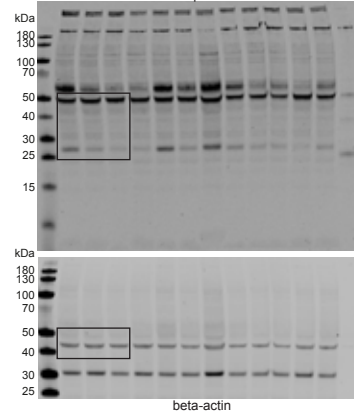

Extended Data Fig. 5c

IL-1beta

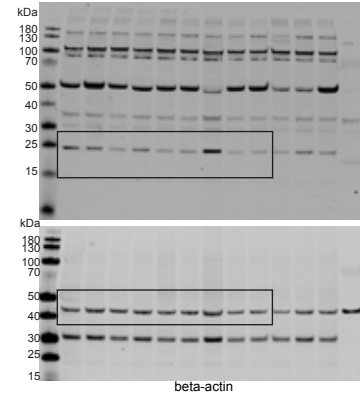

Extended Data Fig. 6e

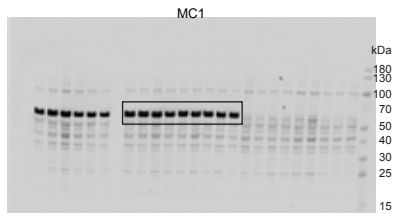

Tau-5

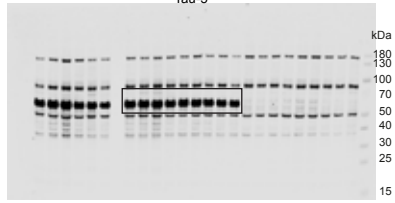

Extended Data Fig. 6g

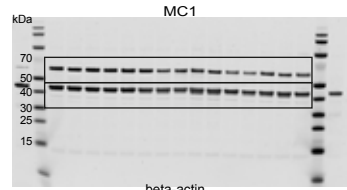

beta-actin

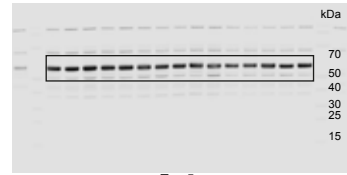

Tau-5

Extended Data Fig. 10a

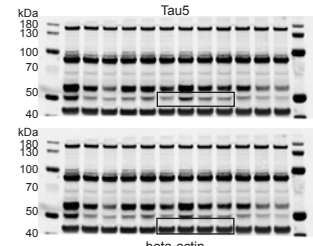

beta-actin

Extended Data Fig. 10g

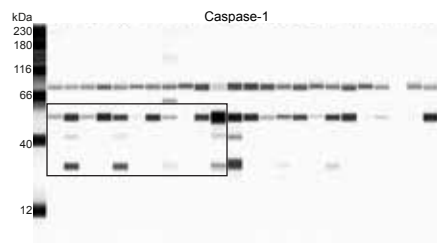

Caspase-1

beta-actin

Extended Data Fig. 10i

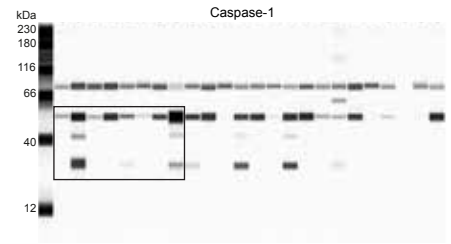

Caspase-1
